# Supplementary material for: Inulin ameliorates schizophrenia via modulation of the gut microbiota and anti-inflammation in mice
Source: Royal Society of Chemistry journal article supplement (doi:10.1039/d0fo02778b), 2020-12-17
Supplement: d0fo02778b1.pdf [file d0fo02778b1.pdf]

Inulin ameliorates schizophrenia via modulating gut microbiota and anti-inflammation in mice

Supplementary Materials

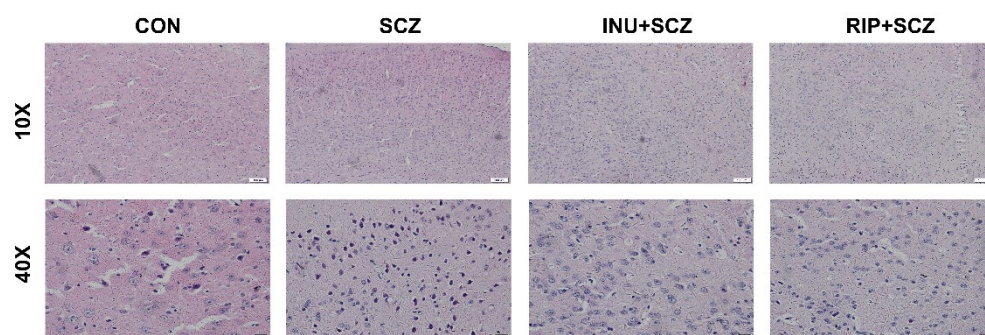

Figure S1 Results of hematoxylin and eosin (HE) staining in brain prefrontal cortex. 10X Bar = 100 $\mu$ m, 40X Bar = 20 $\mu$ m.

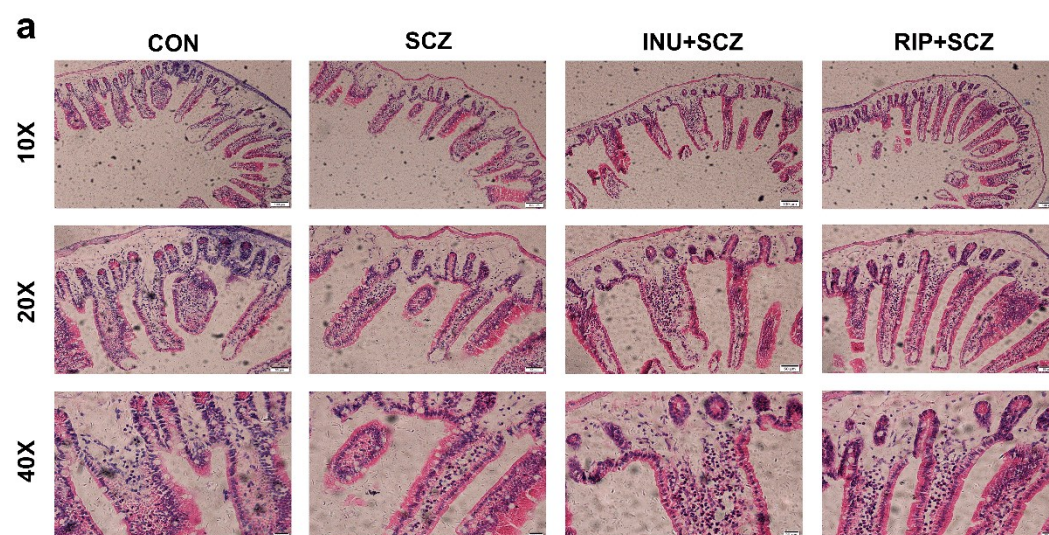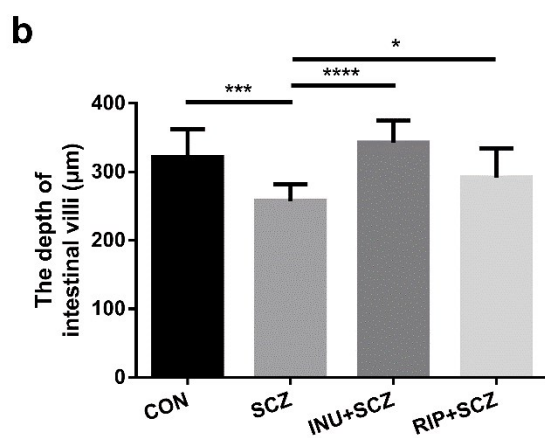

Figure S2 (a) Representative images of small intestine hematoxylin and eosin (HE) staining. 10X Bar = 100 $\mu$ m; 20X Bar = 50 $\mu$ m; 40X Bar = 20 $\mu$ m. (b) The depth of intestinal

villi in diverse groups. Data are expressed as mean  $\pm$  SEM. \*  $p < 0.05$ , \*\*  $p < 0.01$ , \*\*\*  $p < 0.001$ , \*\*\*\*  $p < 0.0001$ .

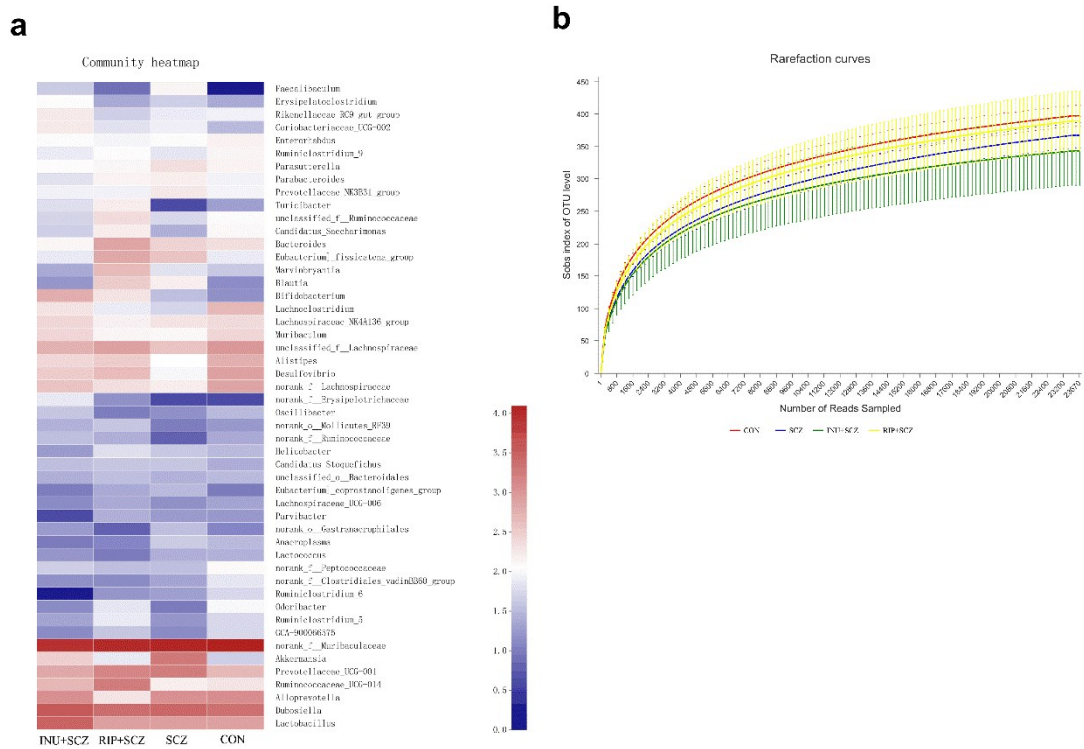

Figure S3 (a) Heat map analysis of microbial community composition in the faeces of mice. (b) Rarefaction curve.

Table S1: Spearman's correlation of relative abundance of individual genera with brain neurotransmitters and BDNF.

| genus                       | HT        | DA        | BDNF      |
|-----------------------------|-----------|-----------|-----------|
| g__Parasutterella           | 0.603312  | 0.111027  | -0.298081 |
| g__Blautia                  | 0.55681   | -0.06772  | -0.418736 |
| g__Parabacteroides          | 0.504328  | 0.024087  | -0.454272 |
| g__Eubacterium]_fissicatena | 0.493419  | -0.157202 | -0.373825 |
| g__Bacteroides              | 0.428733  | -0.003761 | -0.018052 |
| g__norank_f__Muribaculace   | 0.380594  | 0.031591  | 0.048891  |
| g__Akkermansia              | 0.3129    | 0.261     | -0.710041 |
| g__Marvinbryantia           | 0.310618  | -0.271461 | -0.14759  |
| g__Prevotellaceae_UCG-001   | 0.209101  | -0.103046 | -0.382851 |
| g__Dubosiella               | 0.166228  | -0.104551 | -0.356525 |
| g__Prevotellaceae_NK3B31    | 0.068447  | 0.240692  | -0.157954 |
| g__unclassified_f__Ruminoc  | 0.046669  | -0.447874 | 0.216409  |
| g__Desulfovibrio            | -0.050395 | -0.318165 | 0.313652  |
| g__unclassified_f__Lachnos  | -0.101542 | -0.311395 | 0.433246  |
| g__Enterorhabdus            | -0.106095 | 0.080512  | 0.181339  |
| g__Candidatus_Saccharimor   | -0.127588 | -0.251411 | 0.415506  |
| g__Alloprevotella           | -0.13544  | 0.334462  | 0.31678   |
| g__Ruminococcaceae_UCG-     | -0.194058 | -0.269274 | -0.127868 |
| g__norank_f__Lachnospirac   | -0.19526  | -0.31678  | 0.450715  |
| g__Ruminiclostridium_9      | -0.217031 | -0.295404 | 0.407687  |
| g__norank_f__Peptococcac    | -0.229582 | -0.335717 | 0.328942  |
| g__Lachnoclostridium        | -0.254327 | -0.255079 | 0.496238  |
| g__Coriobacteriaceae_UCG-   | -0.254983 | 0.230914  | 0.004513  |
| g__Rikenellaceae_RC9_gut_   | -0.425292 | 0.170493  | -0.165224 |
| g__Bifidobacterium          | -0.458208 | 0.224021  | -0.152861 |
| g__Lachnospiraceae_NK4A1    | -0.487401 | -0.122602 | -0.045882 |
| g__Turicibacter             | -0.492651 | -0.081794 | 0.210328  |
| g__Alistipes                | -0.528969 | -0.117381 | 0.461249  |
| g__Muribaculum              | -0.54607  | -0.034599 | 0.488906  |
| g__Lactobacillus            | -0.566378 | 0.395637  | -0.008274 |
|                             | r>0.45    |           |           |



Table S2. Spearman's correlation of relative abundance of individual genera with brain inflammatory factors.

| genus                              | TNF $\alpha$ | IL_1 $\beta$ | IL_6       | IL_10      |
|------------------------------------|--------------|--------------|------------|------------|
| g__Akkermansia                     | 0.6731935    | 0.56390977   | 0.7112782  | 0.72809332 |
| g__Dubosiella                      | 0.3644582    | 0.47218045   | 0.19548872 | 0.22564876 |
| g__Parabacteroides                 | 0.3440091    | 0.38826196   | 0.43416115 | 0.46857361 |
| g__Parasutterella                  | 0.2641297    | 0.46049674   | 0.21896169 | 0.32969517 |
| g__unclassified_f__Ruminococcaceae | -0.425019    | -0.4890897   | -0.3777277 | -0.3598043 |
| g__Candidatus_Saccharimonas        | -0.4581765   | -0.6207677   | -0.6237775 | -0.5028228 |
| g__unclassified_f__Lachnospiraceae | -0.4774102   | -0.4135338   | -0.4842105 | -0.5791651 |
| g__Muribaculum                     | -0.6076814   | -0.4721805   | -0.5293233 | -0.569387  |
| g__Ruminiclostridium_9             | -0.6235383   | -0.608664    | -0.5770255 | -0.5011309 |
| g__Desulfovibrio                   | -0.6250007   | -0.5052632   | -0.4796992 | -0.5144792 |
| g__norank_f__Peptococcaceae        | -0.6733235   | -0.4996239   | -0.6380739 | -0.48965   |
| g__norank_f__Lachnospiraceae       | -0.702072    | -0.4595713   | -0.5626176 | -0.565839  |
| g__Lachnoclostridium               | -0.7167613   | -0.4565626   | -0.7040241 | -0.5917983 |
| g__Alistipes                       | -0.7446332   | -0.7536668   | -0.7514104 | -0.6809631 |
